# Supplementary material
Source: Royal Society of Chemistry journal article supplement (doi:10.1039/d6ea00039h)
Supplement: d6ea00039h1.pdf [file d6ea00039h1.pdf]

## **Supplement information for**

# **Unveiling the First Two Years Dataset on Atmospheric Deposition of Heavy Metals in Southern Vietnam Megacity: Potential Driving Factors and Ecological Risk Assessment**

Ly Sy Phu Nguyen<sup>1,2\*</sup>, Le Quoc Hau<sup>1,2</sup>, Vo Truong Gia Han<sup>1,2</sup>, Tran Hoang Minh<sup>1,2</sup>, Vo Thi Tam  
Minh<sup>1,2</sup>, Tran Anh Ngan<sup>1,2</sup>, To Thi Hien<sup>1,2</sup>

<sup>1</sup> Faculty of Environment, University of Science, Ho Chi Minh City, Viet Nam.

<sup>2</sup> Vietnam National University, Ho Chi Minh City, Viet Nam.

*\*Corresponding email: Ly Sy Phu Nguyen ([nlsphu@hcmus.edu.vn](mailto:nlsphu@hcmus.edu.vn))*

## Text 1

Prior to each sampling, all collection equipment was rigorously pre-cleaned with 5% HNO<sub>3</sub>, thoroughly rinsed with Milli-Q water, and air-dried for 24 hours to eliminate potential contaminants. After collecting and measuring the rainwater volume, each sample was preserved with 1% (v/v) HNO<sub>3</sub> in a 50 mL Falcon tube and stored at 4 °C until subsequent analysis. Samples were filtered using 0.45 µm PTFE filter and prepared for chemical analysis. To ensure analytical accuracy and minimize contamination, procedural blanks consisting of Milli-Q water were included and treated identically to the rainwater samples. Additionally, to assess potential contamination from the sampling apparatus, field blank samples (rinse the sampling kit with 100 mL Milli-Q) were collected using the same procedures but without exposure to the atmosphere. HM concentrations in all blank samples were shown in Table S1, indicating negligible contamination during sampling and handling.

Although this study focuses on the water-soluble fraction of HMs, which may lead to a certain underestimation of total deposition, the measured values remain representative of the overall pollution levels at the sampling site (HCMC). Existing studies have shown that water-soluble forms account for a substantial proportion of HMs in rainwater (e.g, 95% for Ni, 93% for Pb, 87% for Cd, and 80% for Cr)<sup>1</sup>, supporting the validity of this approach. While pH variations can influence the partitioning between soluble and insoluble forms, particularly underestimating less soluble HMs such as Cd and Pb under neutral conditions, the water-soluble fraction reflects the more bioavailable and ecologically active portion. Moreover, acidifying the sample immediately after collection will help stabilize the pH and create uniformity in pH values between samples (i.e, same solubility potential for HMs between collected samples), improve accuracy, and limit the impact of pH on the solubility of HMs. Therefore, despite certain limitations, these

measurements provide a meaningful indicator of HMs contamination and can be effectively used to assess atmospheric deposition patterns.

Concentration of 8 HMs (Zinc (Zn), Manganese (Mn), Copper (Cu), Cr, Ni, Pb, Vanadium (V), and As) was quantified using Inductively Coupled Mass Spectrometry (ICP-MS) following the US EPA method 200.7 and the US EPA method 200.8. To investigate the potential sources of HMs contamination in rainwater, additional elements (i.e. Selenium (Se), Antimony (Sb), Calcium (Ca), and Iron (Fe)) were quantified using ICP-MS. Calibration was performed with standard solutions (1000 ppm, Merck), yielding calibration curves with correlation coefficients ( $R^2$ ) ranging from 0.95 to 1.00. The method detection limit (MDL) was determined as follows: Zn ( $0.5 \mu\text{g L}^{-1}$ ), Mn ( $0.3 \mu\text{g L}^{-1}$ ), Cr ( $0.1 \mu\text{g L}^{-1}$ ), Cu ( $0.3 \mu\text{g L}^{-1}$ ), Ni ( $0.3 \mu\text{g L}^{-1}$ ), Pb ( $0.03 \mu\text{g L}^{-1}$ ), V ( $0.01 \mu\text{g L}^{-1}$ ), and As ( $0.01 \mu\text{g L}^{-1}$ ). Analytical precision was verified through repeated measurements of both standards and rainwater samples, showing relative standard deviations consistently below 5%. In addition, recovery tests using spiked samples were performed with spiked sample concentrations ranging from 2 - 50  $\mu\text{g L}^{-1}$  (depending on HMs) and yielded recoveries of 90-105%, indicating good accuracy of the analytical method. More details for cleaning procedures, rainwater sample analysis, and quality assurance/quality control (QA/QC) protocols are detailed in Vo et al.<sup>2</sup>

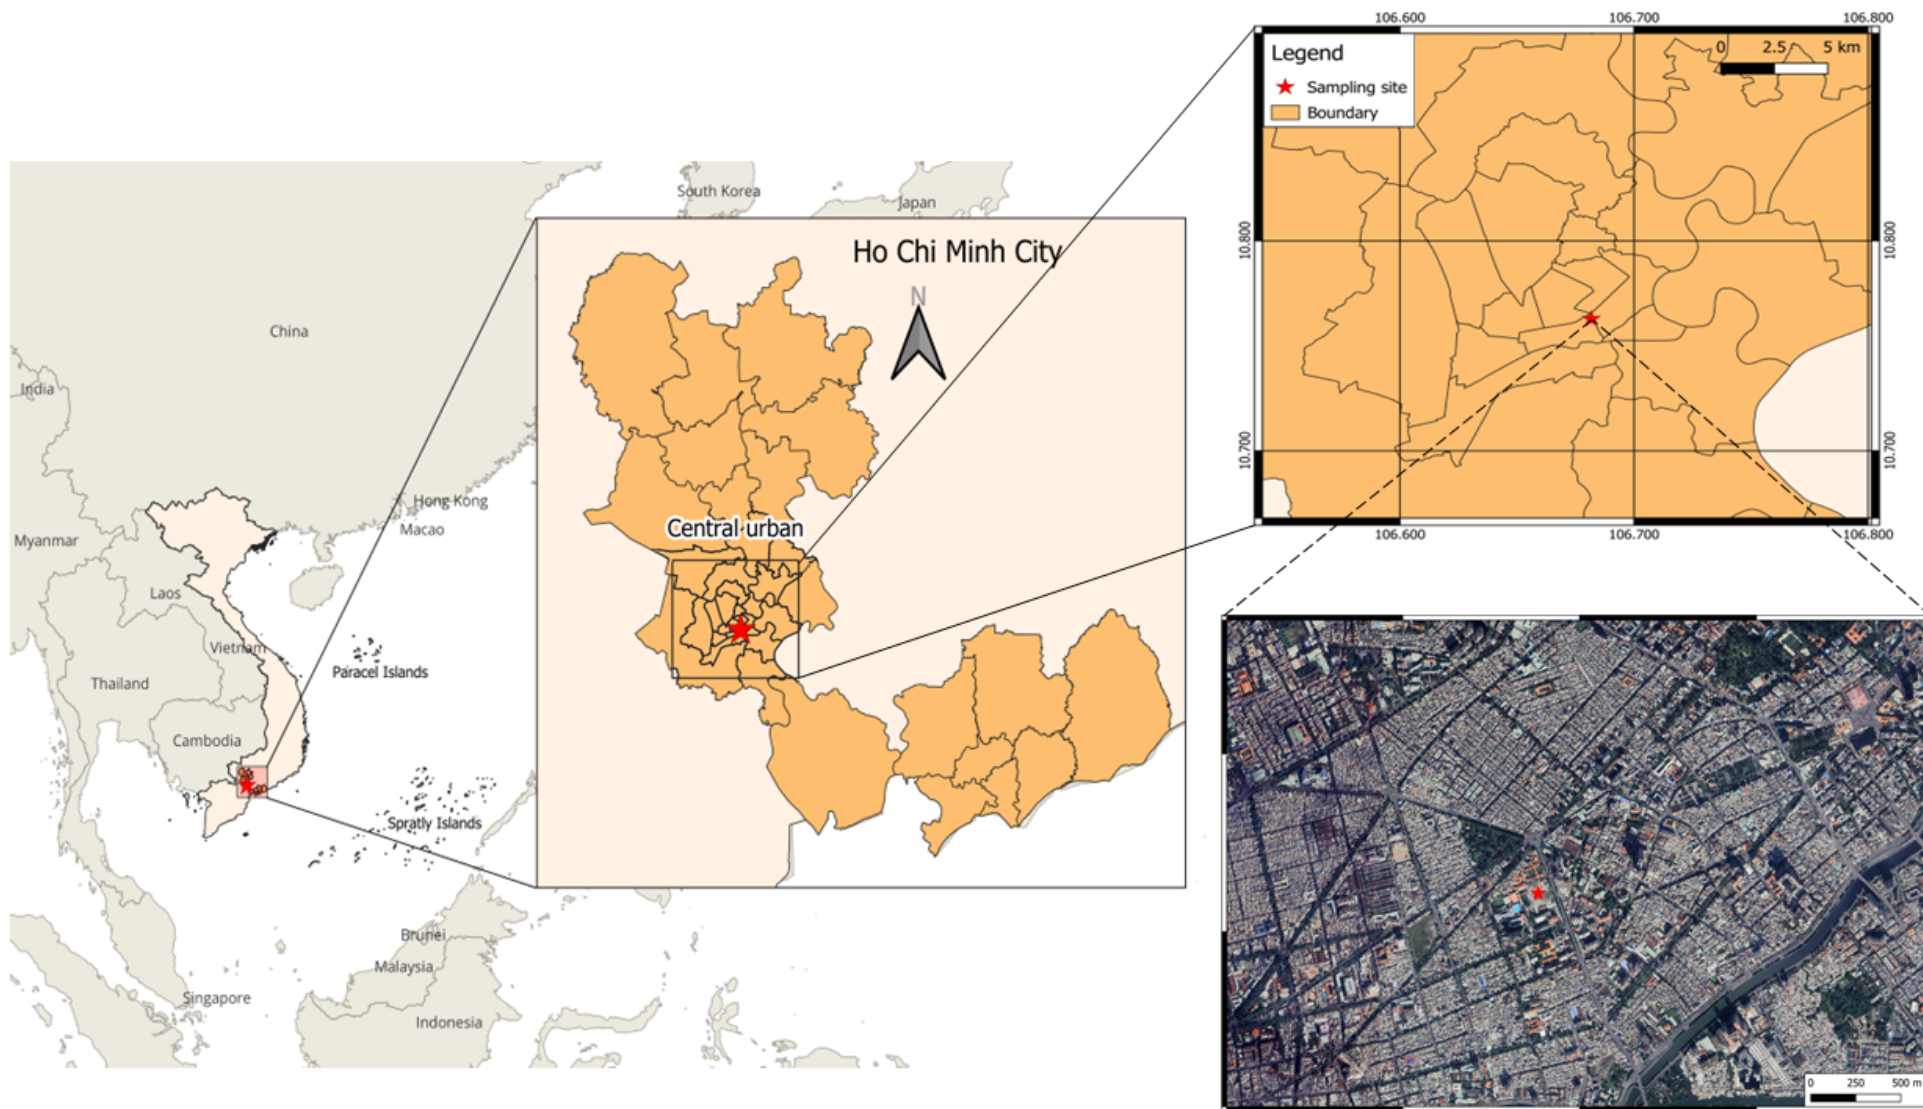

**Fig. S1.** Location of the sampling area (Ho Chi Minh City) and a Google map illustrates the urban area surrounding the sampling site.

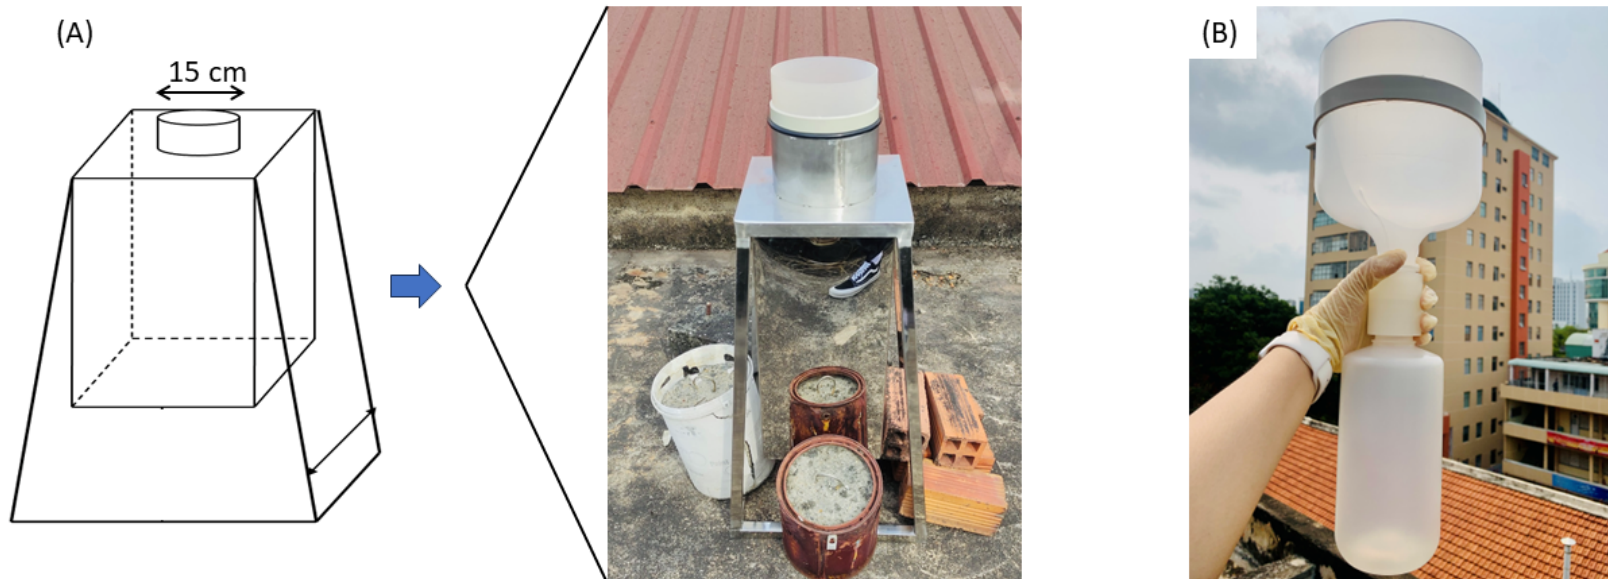

**Fig. S2.** Bulk deposition samplers used for rainwater collection in Ho Chi Minh City (A) Schematic diagram and actual device; (B) The HDPE sampler.

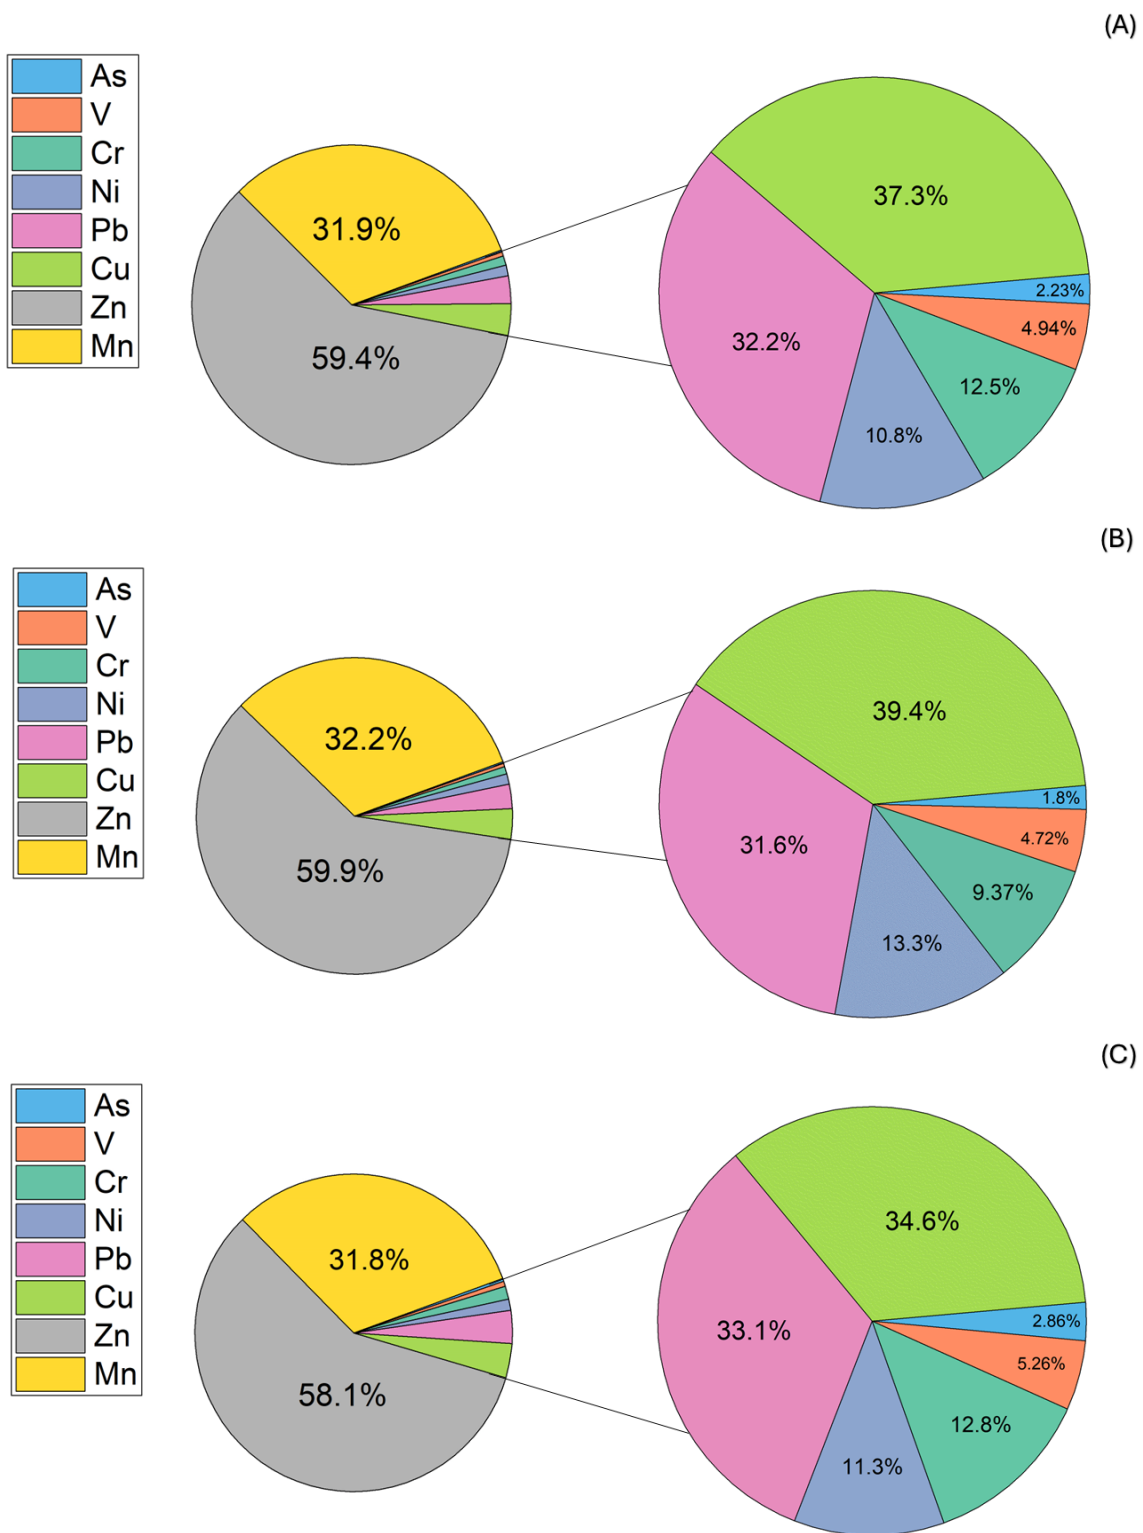

**Fig. S3.** Distribution of heavy metals (%) in (A) during the study period (2023-2024); (B) rainy season; and (C) dry season

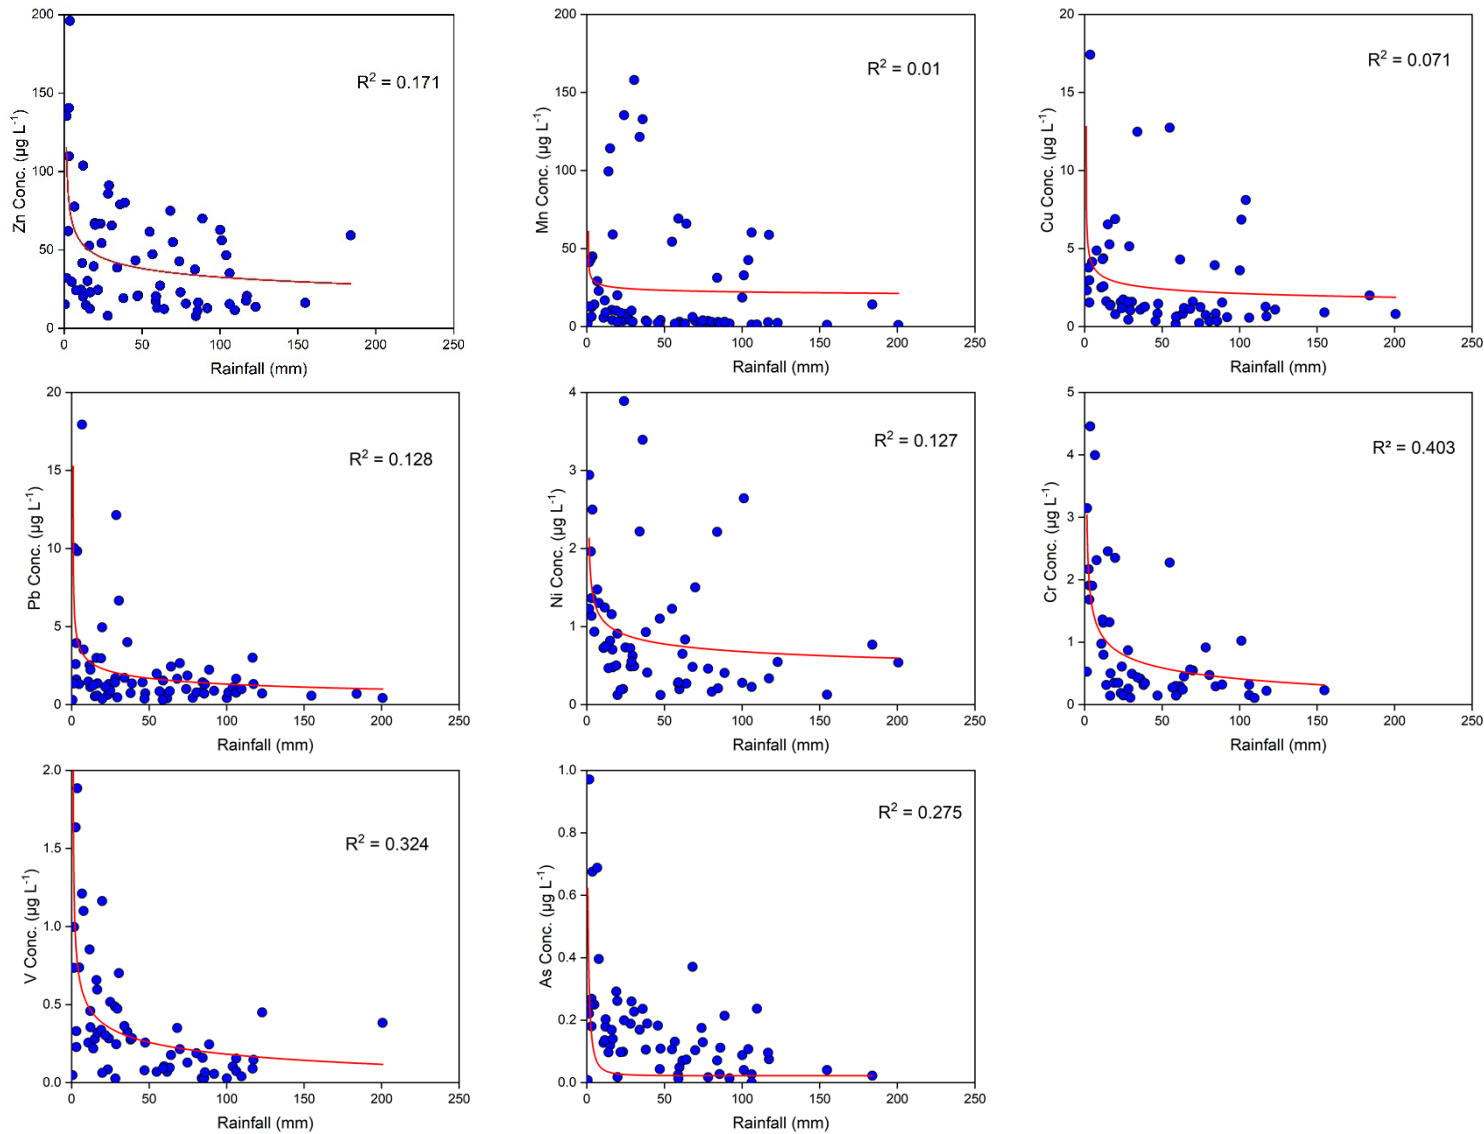

**Fig. S4.** Relationships between rainwater HMs concentration and rainfall amount

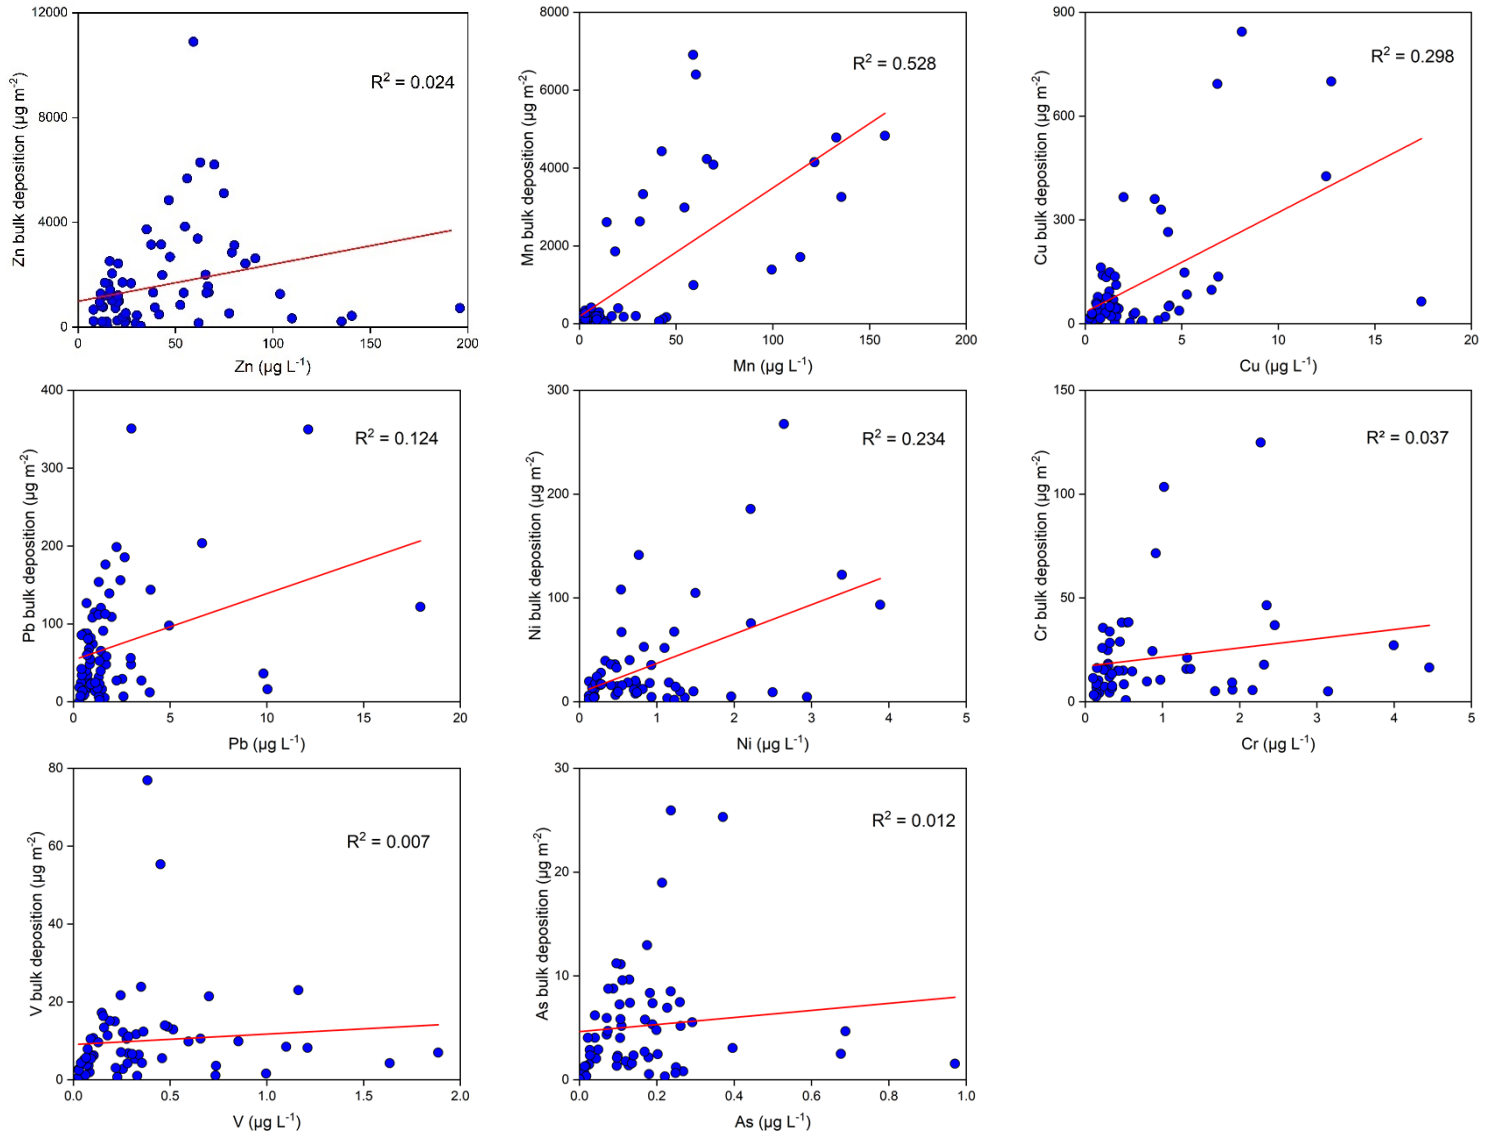

**Fig. S5.** Relationships between rainwater HMs concentration and bulk deposition flux

**Table S1.** Blank levels (mean  $\pm$  S.D.) of selected HMs in this study

| <b>Heavy metal</b> | <b>Concentration (<math>\mu\text{g L}^{-1}</math>)</b> |
|--------------------|--------------------------------------------------------|
| Zn                 | 3.63 $\pm$ 2.06                                        |
| Mn                 | 0.35 $\pm$ 0.25                                        |
| Cu                 | 0.34 $\pm$ 0.17                                        |
| Pb                 | 0.22 $\pm$ 0.12                                        |
| Cr                 | 0.12 $\pm$ 0.05                                        |
| Ni                 | N.D.                                                   |
| V                  | N.D.                                                   |
| As                 | N.D.                                                   |

**Table S2.** Classification criteria for ecological risk indices.

| Parameters | Value range            | Pollution degree           |
|------------|------------------------|----------------------------|
| EF         | $EF < 1$               | No enrichment              |
|            | $1 \leq EF < 3$        | Minor enrichment           |
|            | $3 \leq EF < 5$        | Moderate enrichment        |
|            | $5 \leq EF < 10$       | Moderate severe enrichment |
|            | $10 \leq EF < 25$      | Severe enrichment          |
|            | $25 \leq EF < 50$      | Very severe enrichment     |
| $E_i$      | $E_r^i \leq 30$        | Low risk                   |
|            | $30 < E_r^i \leq 60$   | Medium risk                |
|            | $60 < E_r^i \leq 120$  | High risk                  |
|            | $120 < E_r^i \leq 240$ | Extremely high risk        |
|            | $E_r^i > 240$          | Serious risk               |
| RI         | $RI \leq 60$           | Low risk                   |
|            | $60 < RI \leq 120$     | Medium risk                |
|            | $120 < RI \leq 240$    | High risk                  |
|            | $RI > 240$             | Extremely high risk        |

Note:  $Eir$  is the single factor potential ecological risk index,  $RI$  is comprehensive potential ecological risk index.

**Table S3.** Summary of rain depths, rainwater HM concentrations, and bulk deposition fluxes at HCMC during the study period.

| Date | Sample size | Rain depth (mm) | Variable                                                        | Zn      | Mn      | Cu     | Pb     | Ni     | Cr    | V     | As    |
|------|-------------|-----------------|-----------------------------------------------------------------|---------|---------|--------|--------|--------|-------|-------|-------|
| 2023 | 34          | 1739.8          | VWM ( $\mu\text{g L}^{-1}$ )                                    | 43.1    | 28.3    | 3.26   | 1.31   | 0.98   | 0.54  | 0.15  | 0.11  |
|      |             |                 | Bulk deposition flux ( $\mu\text{g m}^{-2} \text{ year}^{-1}$ ) | 75025.9 | 49255.9 | 5673.9 | 2272.1 | 1703.3 | 939.9 | 257.8 | 184.9 |
| 2024 | 36          | 1970            | VWM ( $\mu\text{g L}^{-1}$ )                                    | 22.7    | 15.8    | 1.05   | 1.73   | 0.43   | 0.30  | 0.22  | 0.08  |
|      |             |                 | Bulk deposition flux ( $\mu\text{g m}^{-2} \text{ year}^{-1}$ ) | 44745.0 | 31046.0 | 2070.5 | 3407.6 | 839.9  | 591.5 | 441.1 | 162.4 |
| All  | 70          | 1854.9          | VWM ( $\mu\text{g L}^{-1}$ )                                    | 32.9    | 22.0    | 2.16   | 1.52   | 0.70   | 0.42  | 0.19  | 0.09  |
|      |             |                 | Bulk deposition flux ( $\mu\text{g m}^{-2} \text{ year}^{-1}$ ) | 59885.4 | 40150.9 | 3872.2 | 2839.8 | 1271.6 | 765.7 | 349.4 | 173.7 |

**Table S4.** Summary of HMs concentrations ( $\mu\text{g L}^{-1}$ ) at HCMC and various sites worldwide.

| Sites                    | Type     | Period    | Zn    | Mn   | Cu   | Pb   | Ni   | Cr   | V    | As   | Reference  |
|--------------------------|----------|-----------|-------|------|------|------|------|------|------|------|------------|
| HCMC, Vietnam            | Urban    | 2023-2024 | 32.9  | 22.0 | 2.16 | 1.52 | 0.7  | 0.42 | 0.19 | 0.09 | This study |
| Kolkatai, India          | Urban    | 2019      | 31    | 14   | 4.1  | 1.0  | 3.7  | 0.82 | 0.76 | -    | 3          |
| Dinajpur, Bangladesh     | Urban    | 2017      | 535.6 | 15.3 | 9.5  | 1.6  | 5.5  | 0.21 | 0.59 | 0.34 | 4          |
| Sylhet, Bangladesh       | Urban    |           | 177.1 | 6.2  | 7.1  | 2.8  | 15.3 | 0.12 | 0.23 | 0.31 |            |
| Singapore                | Urban    | 2000      | 7.23  | 2.78 | 5.58 | 3.37 | 3.86 | 1.62 | 3.54 | -    | 5          |
| Zhanjiang Bay, China     | Suburban | 2021      | 13.02 | -    | 1.16 | 29.3 | -    | -    | -    | 0.18 | 6          |
| Central Himalayas, China | Remote   | 2009-2010 | 0.47  | 0.59 | 0.06 | 0.04 | 0.15 | 0.06 | 0.02 | 0.04 | 7          |
| Jomsom, Nepal            | Remote   | 2020      | 26.54 | 29.7 | 3.66 | 2.37 | 2.97 | 2.66 | 1.83 | 0.54 | 8          |
| Nam Co, China            | Remote   | 2007-2008 | 6.09  | 0.56 | 0.54 | 0.14 | 0.22 | 0.27 | 0.03 | -    | 9          |
| Cox's Bazar, Bangladesh  | Remote   | 2017      | 19.0  | 1.8  | 1.0  | 6.3  | 0.72 | 0.16 | 0.15 | 0.14 | 4          |
| Satkhira, Bangladesh     | Remote   |           | 99.7  | 14.2 | 2.3  | 6.5  | 3.4  | 0.13 | 0.29 | 0.46 |            |
| Northeast Tibet, China   | Remote   | 2018      | 1.2   | 3.5  | 1.5  | 0.14 | 1.4  | 9.2  | 0.48 | 3.1  | 10         |
| Southeast Tibet, China   | Remote   | 2009-2010 | 10.2  | 0.58 | 0.42 | 0.04 | 0.14 | 0.06 | 0.43 | -    | 11         |
| Lhasa, China             | Remote   | 2010-2012 | 14.21 | 7.70 | 1.71 | 1.59 | 0.58 | 0.43 | 0.31 | 0.64 | 12         |
| Chuncheon, Korea         | Remote   | 2012      | 9.9   | 3.23 | 1.73 | 1.51 | 0.52 | -    | 0.14 | 0.4  | 13         |
| Multiple sites, China    | Various  | 2019-2021 | -     | -    | -    | 5.91 | 1.67 | 0.68 | -    | 5.33 | 14         |

**Table S5.** Summary of HMs deposition ( $\mu\text{g m}^{-2} \text{yr}^{-1}$ ) at HCMC and various sites worldwide.

| Sites                    | Type     | Period    | Zn      | Mn      | Cu     | Pb     | Ni     | Cr     | V     | As    | Reference  |
|--------------------------|----------|-----------|---------|---------|--------|--------|--------|--------|-------|-------|------------|
| HCMC, Vietnam            | Urban    | 2023-2024 | 59885.4 | 40150.9 | 3872.2 | 2839.8 | 1271.6 | 765.7  | 349.4 | 173.7 | This study |
| Dinajpur, Bangladesh     | Urban    | 2017      | 938335  | 26890.2 | 16562  | 2840   | 9643   | 367.8  | 1034  | 593.8 | 4          |
| Sylhet, Bangladesh       | Urban    |           | 1052512 | 36771.8 | 42371  | 16938  | 90673  | 696.6  | 1349  | 1820  |            |
| Beijing, China           | Urban    | 2016-2020 | 6180    | 40      | 560    | 12     | 530    | 410    | 160   | 650   | 15         |
| Multiple sites, China    | Urban    | 2019-2021 | -       | -       | -      | 2500   | 1700   | 500    | -     | 4400  | 14         |
| Singapore                | Urban    | 2000      | 18720   | 7280    | 14560  | 8840   | 10140  | 4160   | 9100  | -     | 5          |
| Guangzhou, China         | Urban    | 2014-2015 | 162130  | -       | 22230  | 17000  | -      | 9860   | -     | -     | 16         |
| Dinghushan, China        | Suburban |           | 185780  | -       | 23060  | 42840  | -      | 5960   | -     | -     |            |
| Zhanjiang Bay, China     | Suburban | 2021      | 12510   | -       | 1070   | 38900  | -      | -      | -     | 14000 | 5          |
| Central Himalayas, China | Remote   | 2009-2010 | 134     | 168     | 17.1   | 10.4   | 41.8   | 15.8   | 6.75  | 12.3  | 6          |
| Jomsom, Nepal            | Remote   | 2020      | 3503.9  | 3927    | 482.8  | 313.1  | 391.4  | 351    | 241.4 | 71.8  | 7          |
| Yangtze River Delta      | Remote   | 2019-2020 | 295     | -       | 115.3  | -      | 48.3   | 130.14 | -     | -     | 17         |
| Cox's Bazar, Bangladesh  | Remote   | 2017      | 75.26   | 7226.5  | 3756   | 25008  | 2835   | 636.4  | 587.8 | 548   | 4          |
| Satkhira, Bangladesh     | Remote   |           | 192441  | 27380.2 | 4452   | 12549  | 6491   | 256.65 | 560.3 | 893.3 |            |
| Multiple sites, China    | Remote   | 2019-2021 | -       | -       | -      | 2200   | 1100   | 300    | -     | 4000  | 14         |
| Nam Co, China            | Remote   | 2007-2008 | 266     | 297     | 231    | 60     | 97     | 139    | 33    | -     | 9          |
| Southeast Tibet, China   | Remote   | 2009-2010 | 9183    | 520     | 377    | 32.3   | 126    | 54     | 385   | -     | 11         |
| Lhasa, China             | Remote   | 2010-2012 | 5211    | 2423    | 584    | 516    | 171    | 118    | 353   | 233   | 12         |
| Multiple sites, China    | Remote   | 2019-2021 | -       | -       | -      | 8100   | 1300   | 400    | -     | 4800  | 14         |

**Table S6.** The HMs concentration ( $\mu\text{g L}^{-1}$ ) for each cluster.

| Cluster | V    | Cr   | Mn   | Ni   | Cu   | Zn   | As   | Pb   | Total |
|---------|------|------|------|------|------|------|------|------|-------|
| 1       | 0.54 | 1.32 | 32.4 | 1.12 | 4.37 | 50.1 | 0.24 | 2.93 | 93.0  |
| 2       | 0.50 | 1.34 | 25.3 | 1.07 | 1.97 | 44.6 | 0.24 | 3.28 | 78.2  |
| 3       | 0.23 | 0.67 | 17.9 | 0.75 | 1.81 | 35.8 | 0.11 | 1.32 | 58.6  |
| 4       | 0.32 | 0.65 | 23.3 | 0.98 | 2.89 | 34.7 | 0.14 | 2.20 | 65.2  |

**Table S7.** Information of EFs of HMs in this study.

|    | HMs           | V          | Cr         | Mn         | Ni         | Cu         | Zn          | As         | Pb         |
|----|---------------|------------|------------|------------|------------|------------|-------------|------------|------------|
| EF | Average $\pm$ | 3.64 $\pm$ | 19.3 $\pm$ | 22.0 $\pm$ | 44.6 $\pm$ | 90.2 $\pm$ | 307.1 $\pm$ | 57.9 $\pm$ | 73.7 $\pm$ |
|    | Stdev         | 8.05       | 40.4       | 43.9       | 126.8      | 149.5      | 293.4       | 71.3       | 143.1      |
|    | Min -         | 0.14 -     | 0.56 -     | 0.65 -     | 1.08 -     | 2.16 -     | 0.91 -      | 1.12 -     | 3.91 -     |
|    | Max           | 52.5       | 227.1      | 240.2      | 945.9      | 746.2      | 1181.0      | 400.6      | 978.9      |

**Table S8.** Correlation matrix of HMs concentrations in rainfall. The Upper shows the results, the lower shows *p*-values.

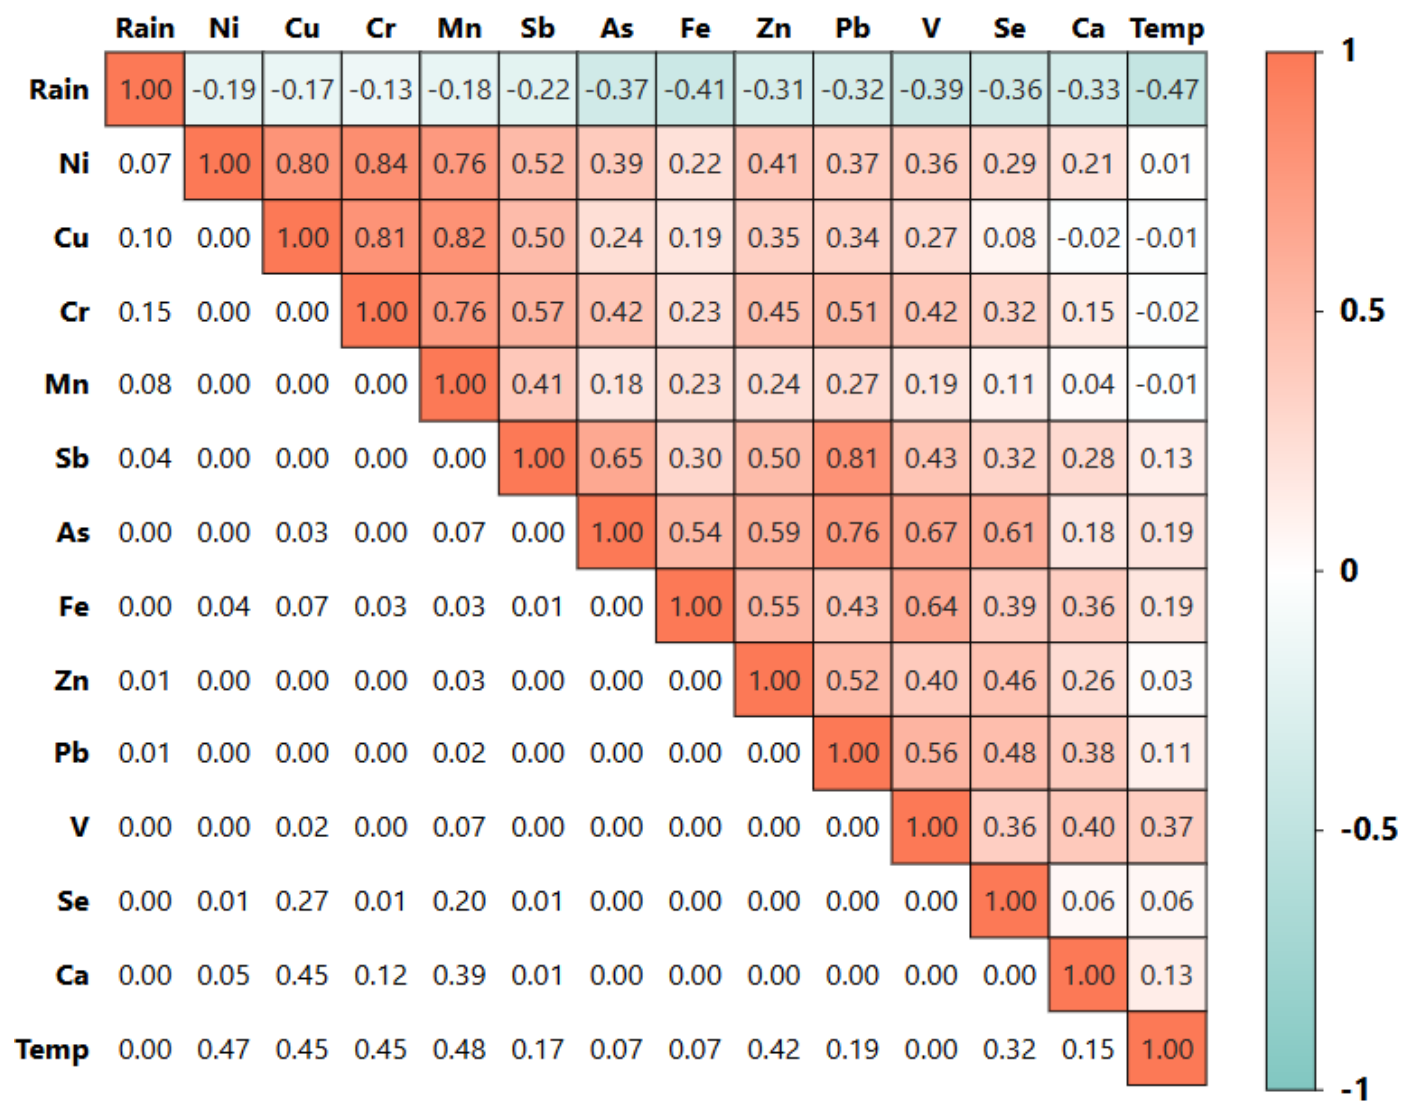

**Table S9.** The Total Variance Explained of PCA

| Component | Total Variance Explained |               |              |
|-----------|--------------------------|---------------|--------------|
|           | Total                    | % of Variance | Cumulative % |
| 1         | 5.138                    | 39.525        | 39.525       |
| 2         | 2.024                    | 15.566        | 55.091       |
| 3         | 1.291                    | 9.932         | 65.022       |
| 4         | 1.082                    | 8.327         | 73.349       |

## Reference

1. Cizmecioglu, S.C., Muezzinoglu, A., 2008. Solubility of deposited airborne heavy metals. *Atmospheric Research* 89, 396–404. <https://doi.org/10.1016/j.atmosres.2008.03.012>
2. Vo, T.G.H., Nguyen, L.S.P., Trinh, P.D., Nguyen, C.M.D., Le, H.Q., 2024. Sampling and determination of metals in rainwater in Ho Chi Minh City. *Journal of Natural Sciences* 7, 80–93. <https://doi.org/10.32508/stdjns.v7iS1.1360>
3. Majumdar, A., Satpathy, J., Kayee, J., Das, R., 2020. Trace metal composition of rainwater and aerosol from Kolkata, a megacity in eastern India. *SN Applied Sciences* 2, 2122. <https://doi.org/10.1007/s42452-020-03933-2>
4. Adhikari, S., Zeng, C., Zhang, F., Adhikari, N.P., Gao, J., Ahmed, N., Khan, M.H.R., 2023. Atmospheric wet deposition of trace elements in Bangladesh: A new insight into spatiotemporal variability and source apportionment. *Environmental Research* 217, 114729. <https://doi.org/10.1016/j.envres.2022.114729>
5. Hu, G.P., Balasubramanian, R., 2003. Wet deposition of trace metals in Singapore. *Water, Air, and Soil Pollution* 144, 285–300. <https://doi.org/10.1023/A:1022921418383>
6. Hu, X., Xu, S., Deng, X., Wang, C., 2024. Temporal variation, sources, fluxes, and risk assessment of heavy metals and arsenic in rainwater from Zhanjiang Bay, Northern South China Sea: Impact of typhoons Lion and Kompas. *Marine Pollution Bulletin* 209, 117077. <https://doi.org/10.1016/j.marpolbul.2024.117077>
7. Cong, Z., Kang, S., Zhang, Y., 2015. New insights into trace element wet deposition in the Himalayas: Amounts, seasonal patterns, and implications. *Environmental Science and Pollution Research* 22, 2735–2744. <https://doi.org/10.1007/s11356-014-3496-1>
8. Tripathee, L., Guo, J., Kang, S., Paudyal, R., Sharma, C.M., Huang, J., Sillanpää, M., 2020. Measurement of mercury, other trace elements and major ions in wet deposition at Jomsom: The semi-arid mountain valley of the Central Himalaya. *Atmospheric Research* 234, 104691. <https://doi.org/10.1016/j.atmosres.2019.104691>
9. Cong, Z., Kang, S., Zhang, Y., Li, X., 2010. Atmospheric wet deposition of trace elements to central Tibetan Plateau. *Applied Geochemistry* 25, 1415–1421. <https://doi.org/10.1016/j.apgeochem.2010.06.011>
10. Wei, T., Dong, Z., Kang, S., Zong, C., Rostami, M., Shao, Y., 2019. Atmospheric deposition and contamination of trace elements in snowpacks of mountain glaciers in the northeastern Tibetan Plateau. *Science of the Total Environment* 689, 754–764. <https://doi.org/10.1016/j.scitotenv.2019.06.455>
11. Liu, B., Kang, S., Sun, J., Zhang, Y., Xu, R., Wang, Y., Cong, Z., 2013. Wet precipitation chemistry at a high-altitude site (3,326 m asl) in the southeastern Tibetan Plateau. *Environmental Science and Pollution Research* 20, 5013–5027. <https://doi.org/10.1007/s11356-012-1379-x>
12. Guo, J., Kang, S., Huang, J., Zhang, Q., Tripathee, L., Sillanpää, M., 2015. Seasonal variations of trace elements in precipitation at the largest city in Tibet, Lhasa. *Atmospheric Research* 153, 87–97. <https://doi.org/10.1016/j.atmosres.2014.07.030>

13. Kim, J.E., Han, Y.J., Kim, P.R., Holsen, T.M., 2012. Factors influencing atmospheric wet deposition of trace elements in rural Korea. *Atmospheric Research* 116, 185–194. <https://doi.org/10.1016/j.atmosres.2012.04.013>
14. Ma, X., Sha, Z., Li, Y., Si, R., Tang, A., Fangmeier, A., Liu, X., 2024. Temporal-spatial characteristics and sources of heavy metals in bulk deposition across China. *Science of the Total Environment* 926, 171903. <https://doi.org/10.1016/j.scitotenv.2024.171903>
15. Pan, Y., Liu, J., Zhang, L., Cao, J., Hu, J., Tian, S., Xu, W., 2021. Bulk deposition and source apportionment of atmospheric heavy metals and metalloids in agricultural areas of rural Beijing during 2016–2020. *Atmosphere* 12, 283. <https://doi.org/10.3390/atmos12020283>
16. Ye, L., Huang, M., Zhong, B., Wang, X., Tu, Q., Sun, H., Chang, M., 2018. Wet and dry deposition fluxes of heavy metals in Pearl River Delta Region (China): Characteristics, ecological risk assessment, and source apportionment. *Journal of Environmental Sciences* 70, 106–123. <https://doi.org/10.1016/j.jes.2017.11.019>
17. Liu, P., Wu, Q., Hu, W., Tian, K., Huang, B., Zhao, Y., 2023. Effects of atmospheric deposition on heavy metals accumulation in agricultural soils: Evidence from field monitoring and Pb isotope analysis. *Environmental Pollution* 330, 121740. <https://doi.org/10.1016/j.envpol.2023.121740>
